# Supplementary material
Source: PubMed Central journal article supplement (PMC5237115)
Supplement: JB.00695-16_zjb999094303s1.pdf [file JB.00695-16_zjb999094303s1.pdf]

## Supplementary figures

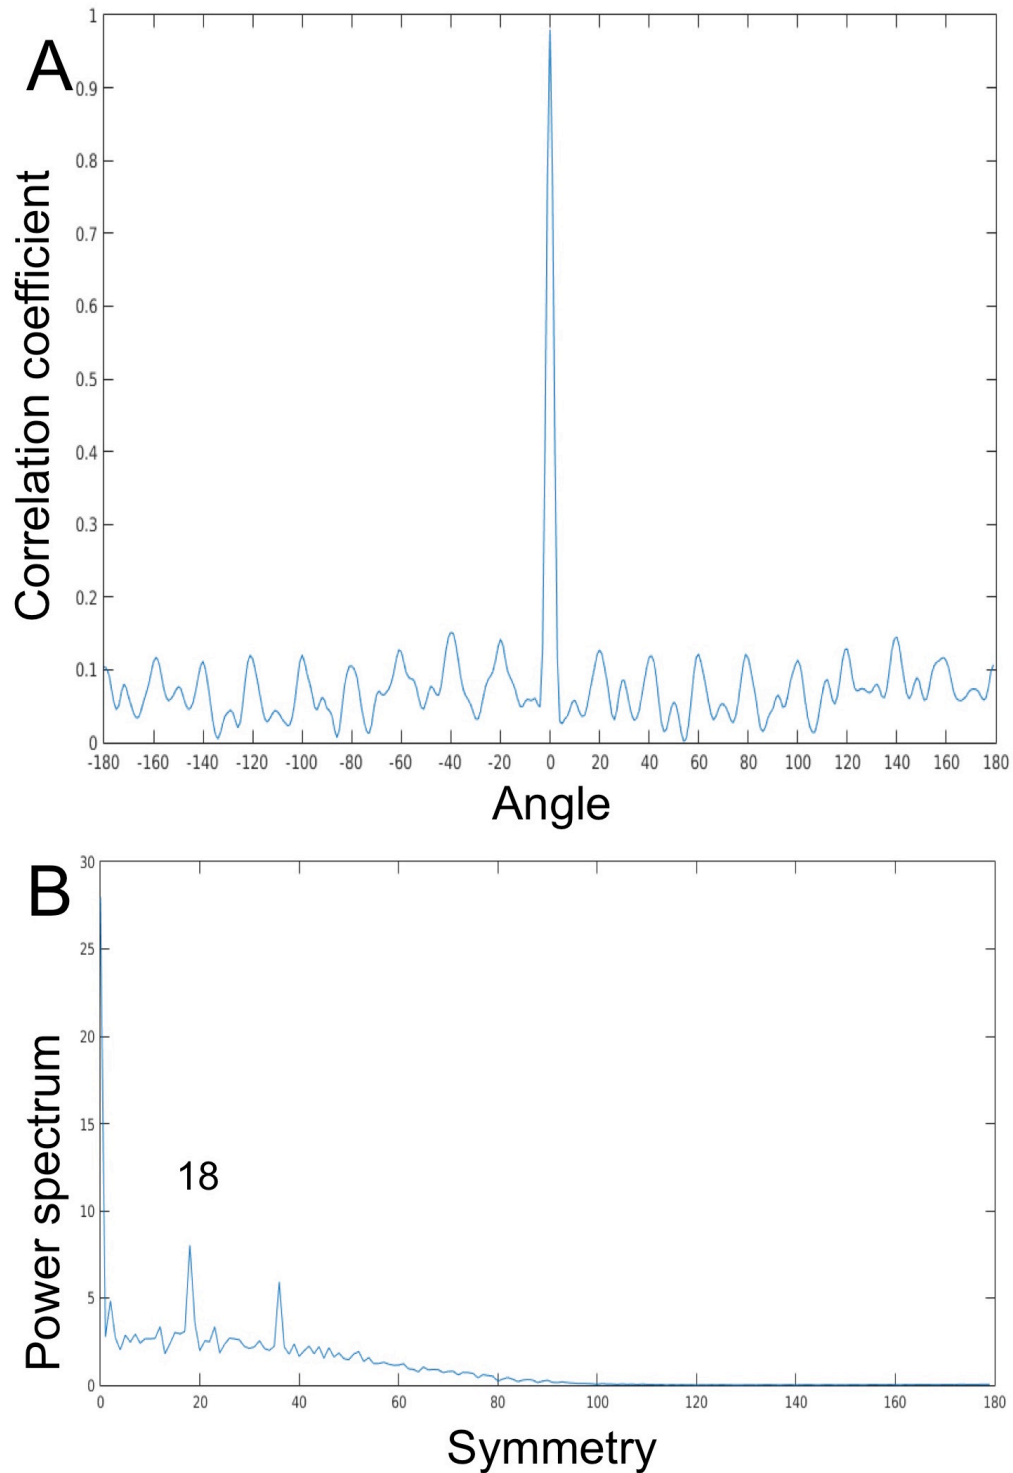

**Fig. S1.** Symmetry analysis of the cage structure in the *H. pylori* flagellar motor. The rotation correlation shows peaks every 20° (A). The Fourier transform of the cross correlation has a peak at 18 fold symmetry (B).

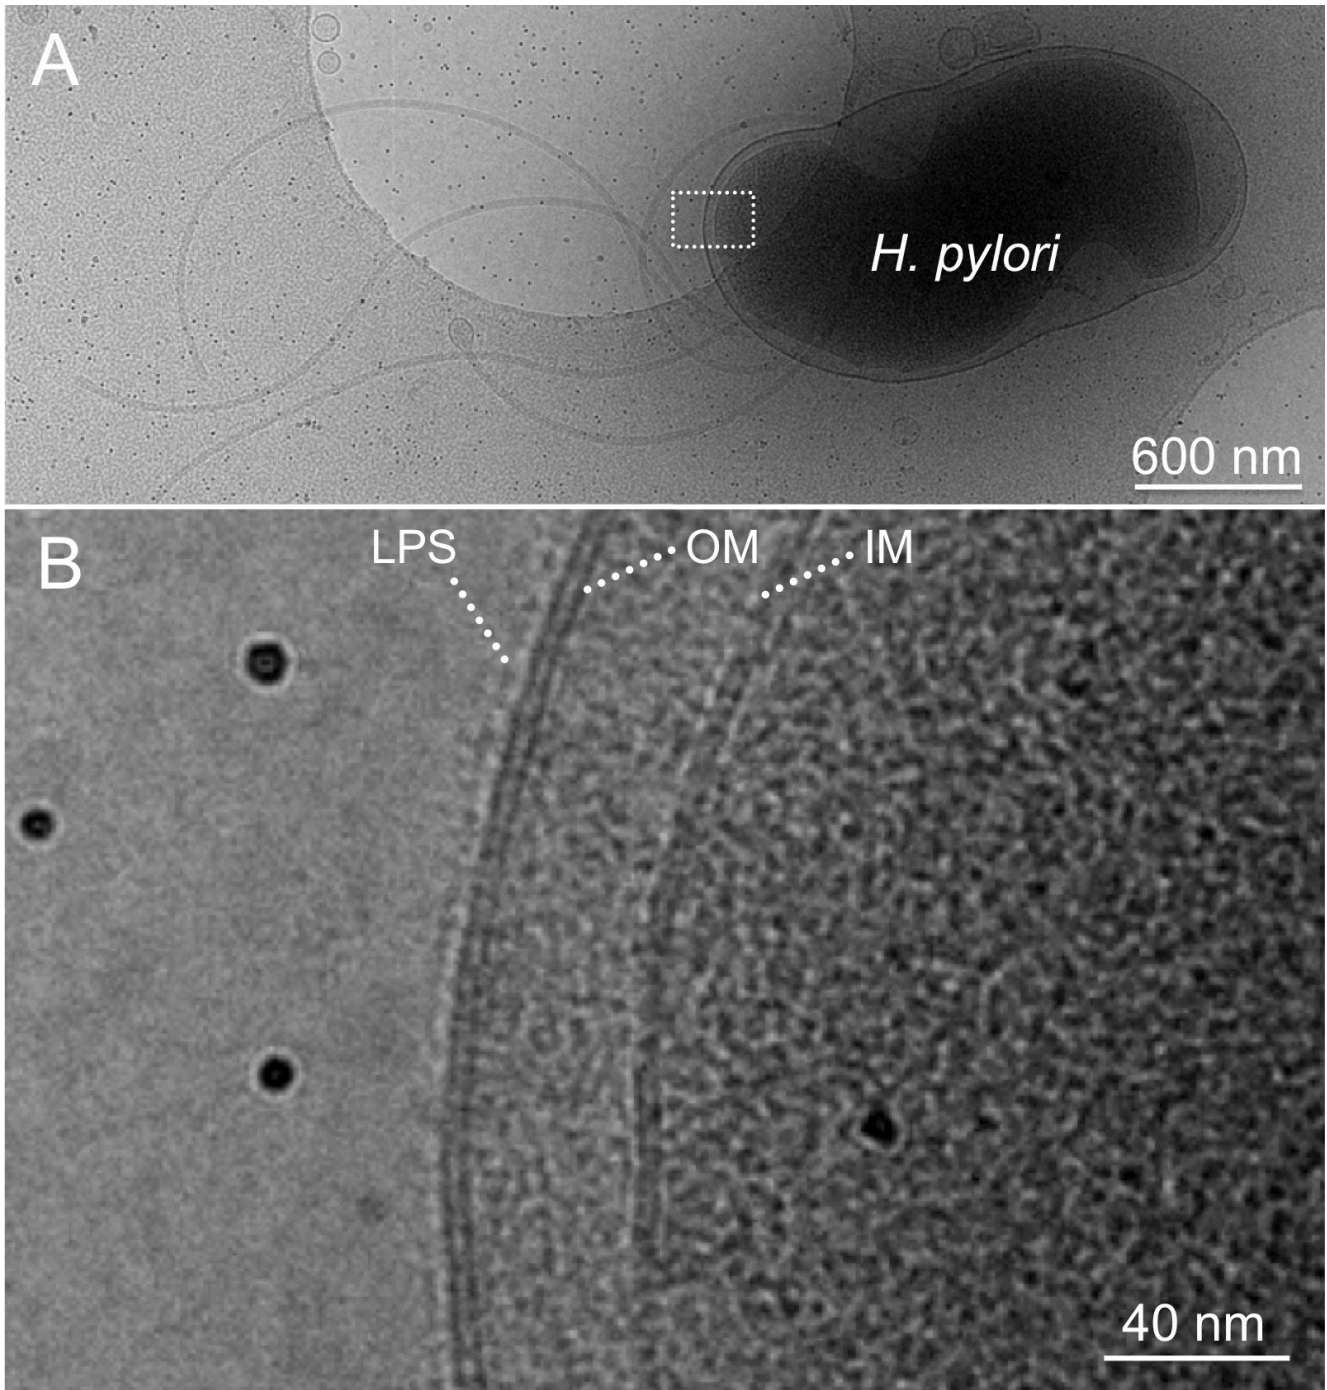

**Fig. S2.** Cryo-EM images of a *H. pylori* cell and its surface features. An overview of one cell at low magnification (top panel) shows cell shape and flagella attached at one pole. A high magnification image at the cell pole reveals major surface features, such as LPS and two membranes (OM and IM).

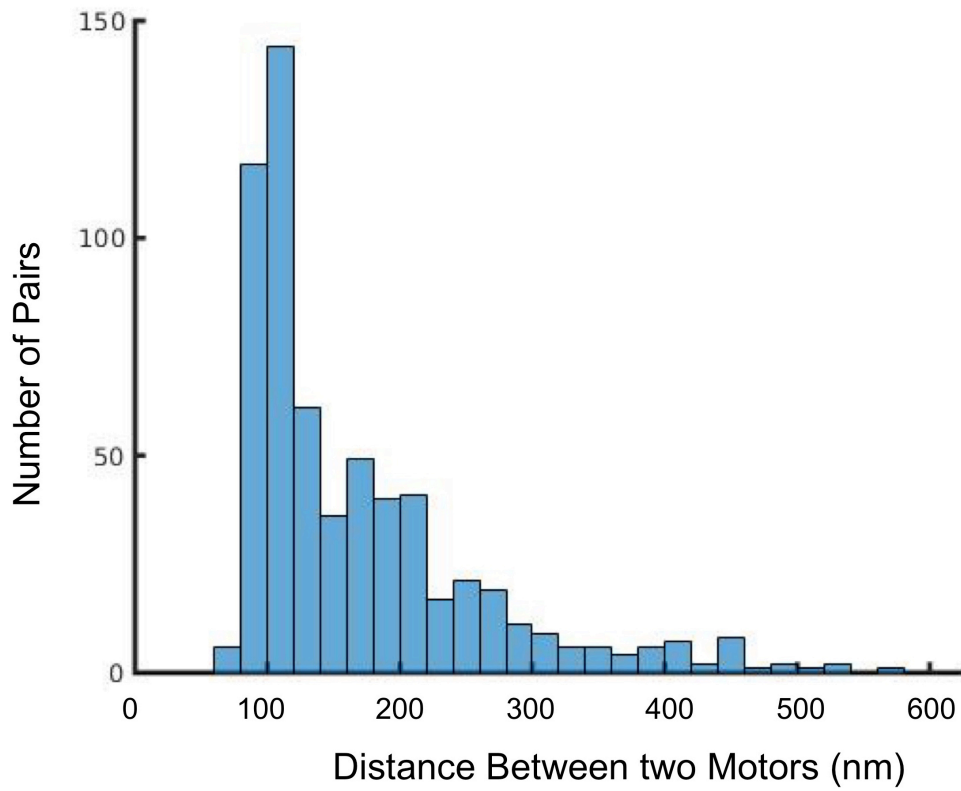

**Fig. S3.** Distribution of the distance between two flagella in cells.

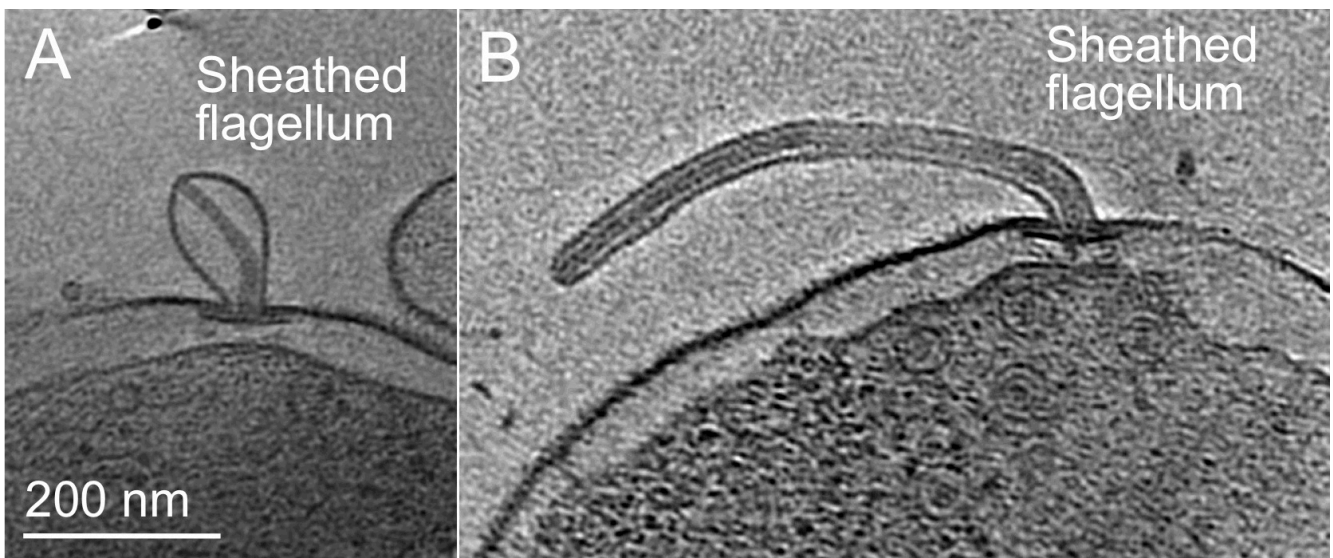

**Fig. S4.** Tomographic slices show sheathed flagella with variable length. Note that the flagellar filaments are enveloped with membrane sheath.
